# Supplementary figures and images for: Ultrasound imaging measures of vertebral bony landmark distances are weakly to moderately correlated with intervertebral disc height as assessed by MRI
Source: HighWire-hosted journal article supplement (doi:10.1136/bmjsem-2021-001292), 2022-03-01

Supplemental material figure 1. Bland-Altman plots for significant correlations

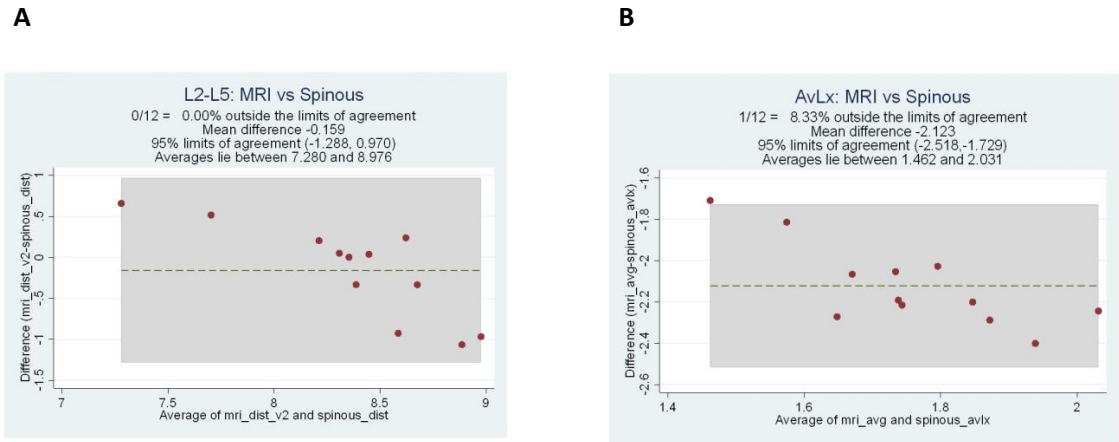

Supplement: bmjsem-2021-001292supp001_data_supplement.pdf [file bmjsem-2021-001292supp001_data_supplement.pdf]
